# Supplementary material for: A systematic screening assay identifies efficient small guide RNAs for CRISPR activation
Source: Frontiers journal article supplement (doi:10.3389/fbioe.2025.1336313), 2025-01-23
Supplement: Image_1.pdf [file Image_1.pdf]

# **A systematic screening assay identifies efficient small guide RNAs for CRISPR activation**

**Elin Arvidsson<sup>1</sup>, Diana Duarte Lobo<sup>2,3</sup>, Ermelinda Sabarese<sup>1</sup>, Fabio Duarte<sup>1</sup>, Rui Jorge Nobre<sup>2,3,4</sup>, Luis Quintino<sup>1</sup>, Cecilia Lundberg<sup>1\*</sup>**

<sup>1</sup> CNS Gene Therapy, Department of Experimental Medical Sciences, Lund University,  
Lund, Sweden

<sup>2</sup> Molecular Therapy of Brain Disorders Group, CNC - Center for Neuroscience and Cell Biology of  
Coimbra, University of Coimbra, Coimbra, Portugal

<sup>3</sup> Institute for Interdisciplinary Research, University of Coimbra, Coimbra, Portugal

<sup>4</sup> ViraVector – Viral Vector for Gene Transfer Core Facility, University of Coimbra, Coimbra,  
Portugal

**\* Correspondence:**

Cecilia Lundberg  
cecilia.lundberg@med.lu.se

## **Supplementary Material**

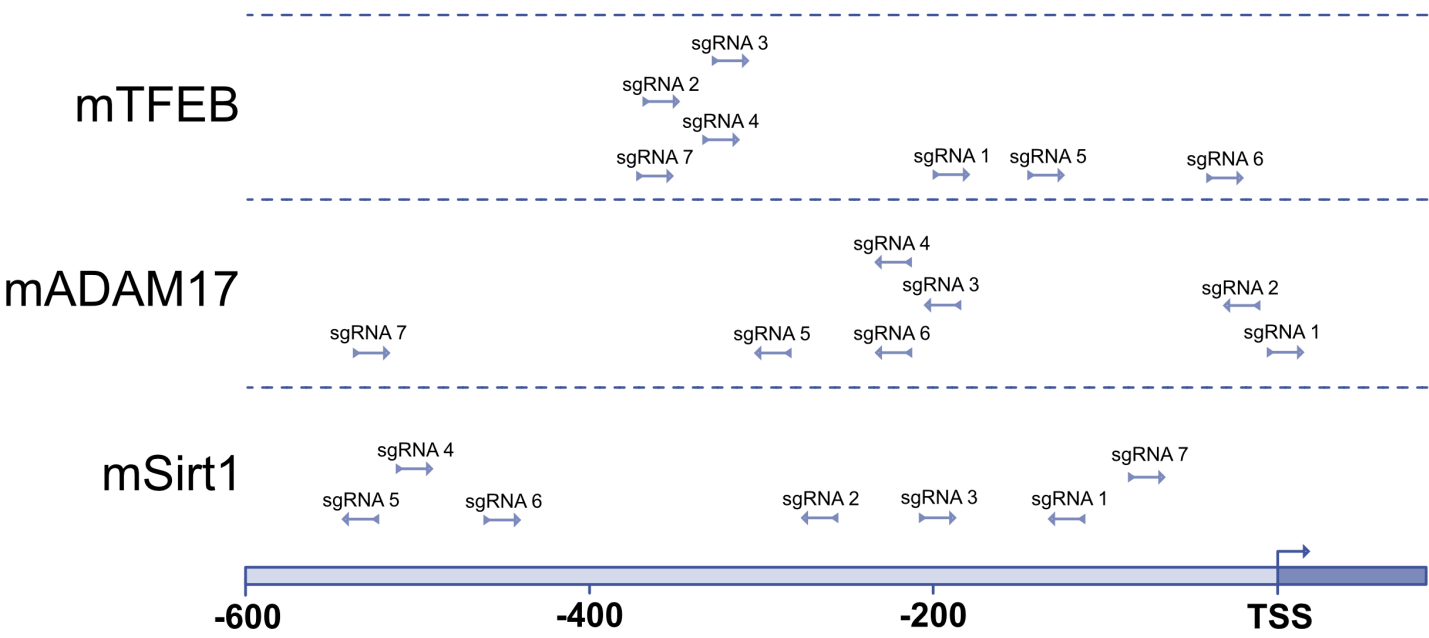

**Supplementary figure 1: sgRNA sequences relative to transcriptional start site.**

sgRNA 1 to 7 for mouse Tfeb, mouse Adam17 and mouse Sirt1 illustrated relative to the transcriptional start site (TSS) for each of their respective genes.

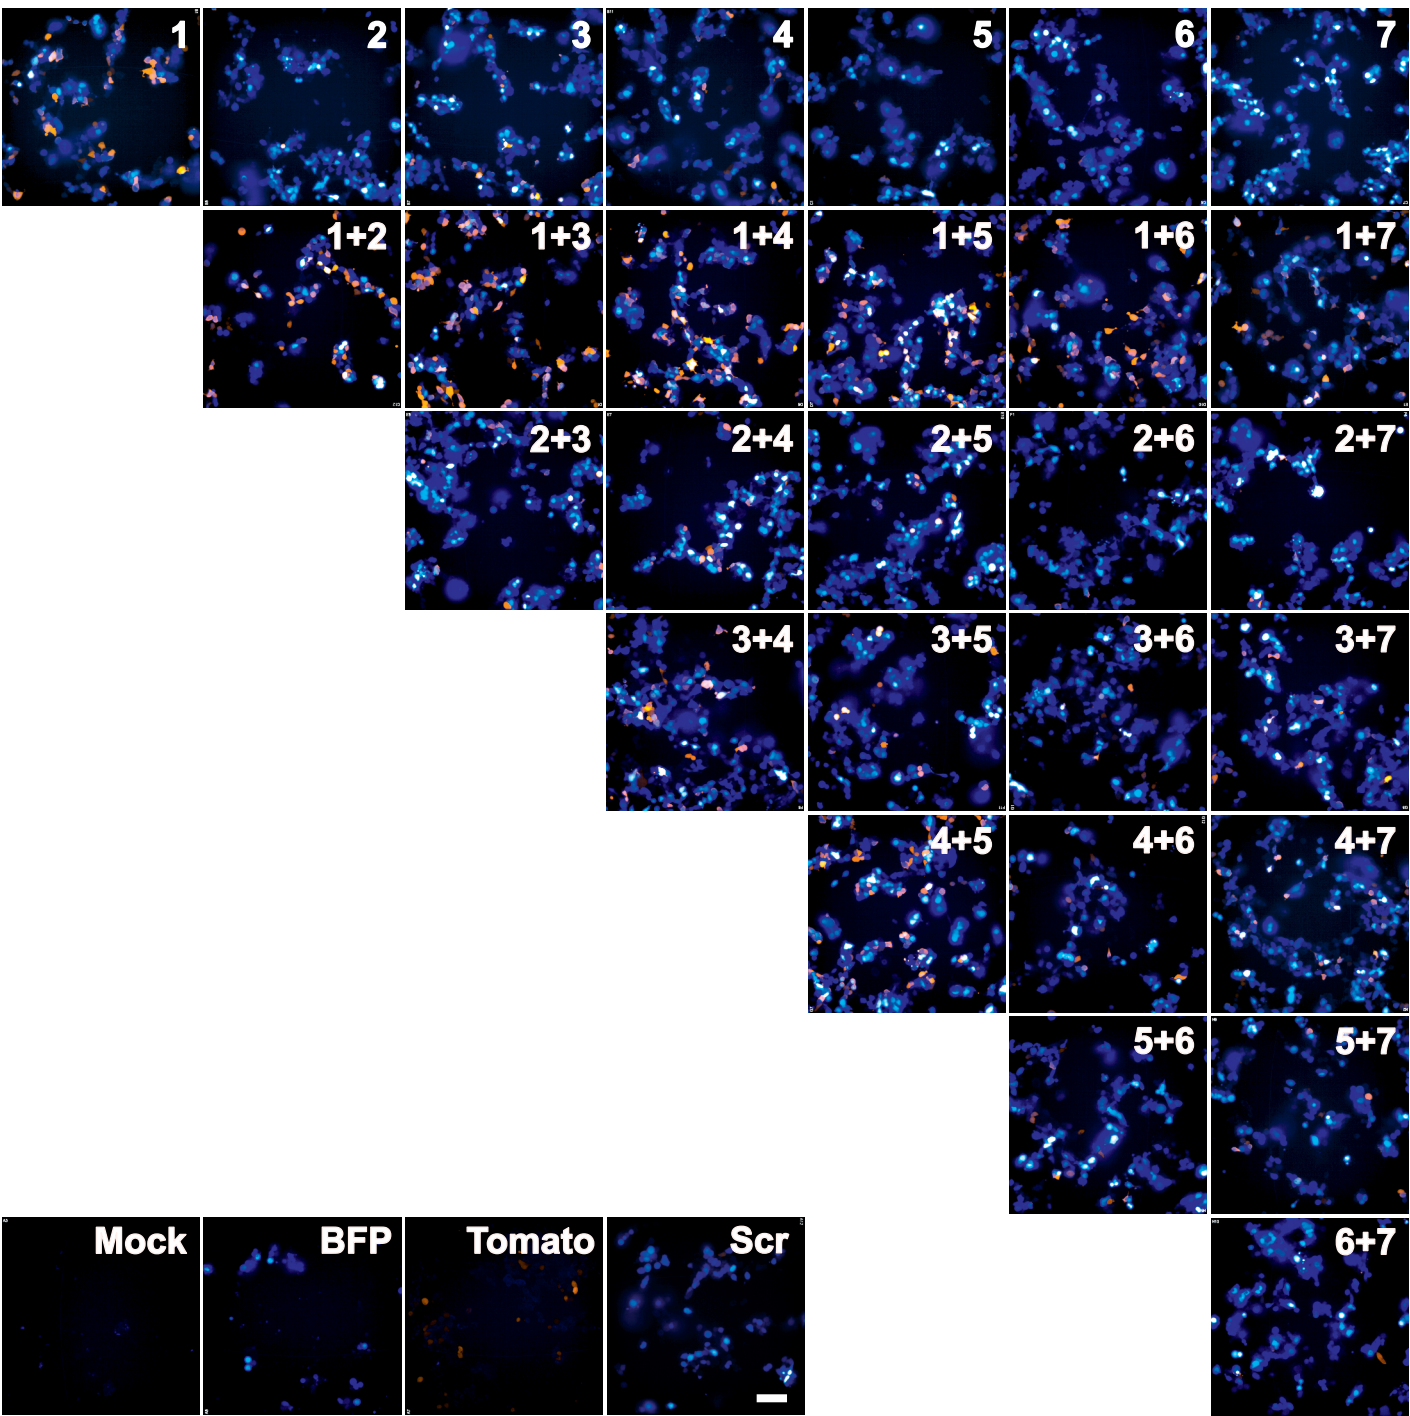

**Supplementary figure 2: Fluorescence images of the screening assay using mouse Sirt1.**

293T cells were transfected with pDPL0 expressing sgRNA, reporter constructs expressing TdTomato, MiniCas9V2 and BFP. Forty-eight hours after transfection, the cells were fixed and the TdTomato and BFP fluorescence were measured. Each number denotes an sgRNA. Mock - mock transfected cells. BFP - cells transfected with BFP and MiniCas9V2. Tomato - cells transfected with TdTomato reporter and MiniCas9V2. Scr - cells transfected with Scramble sgRNA, MiniCas9V2, TdTomato reporter and BFP. Scale bar -100  $\mu$ m.
